# Supplementary material for: Analyses on the pigment composition of different seed coat colors in adzuki bean
Source: PubMed Central journal article supplement (PMC9361439; doi:10.1002/fsn3.2866), 2022-04-18

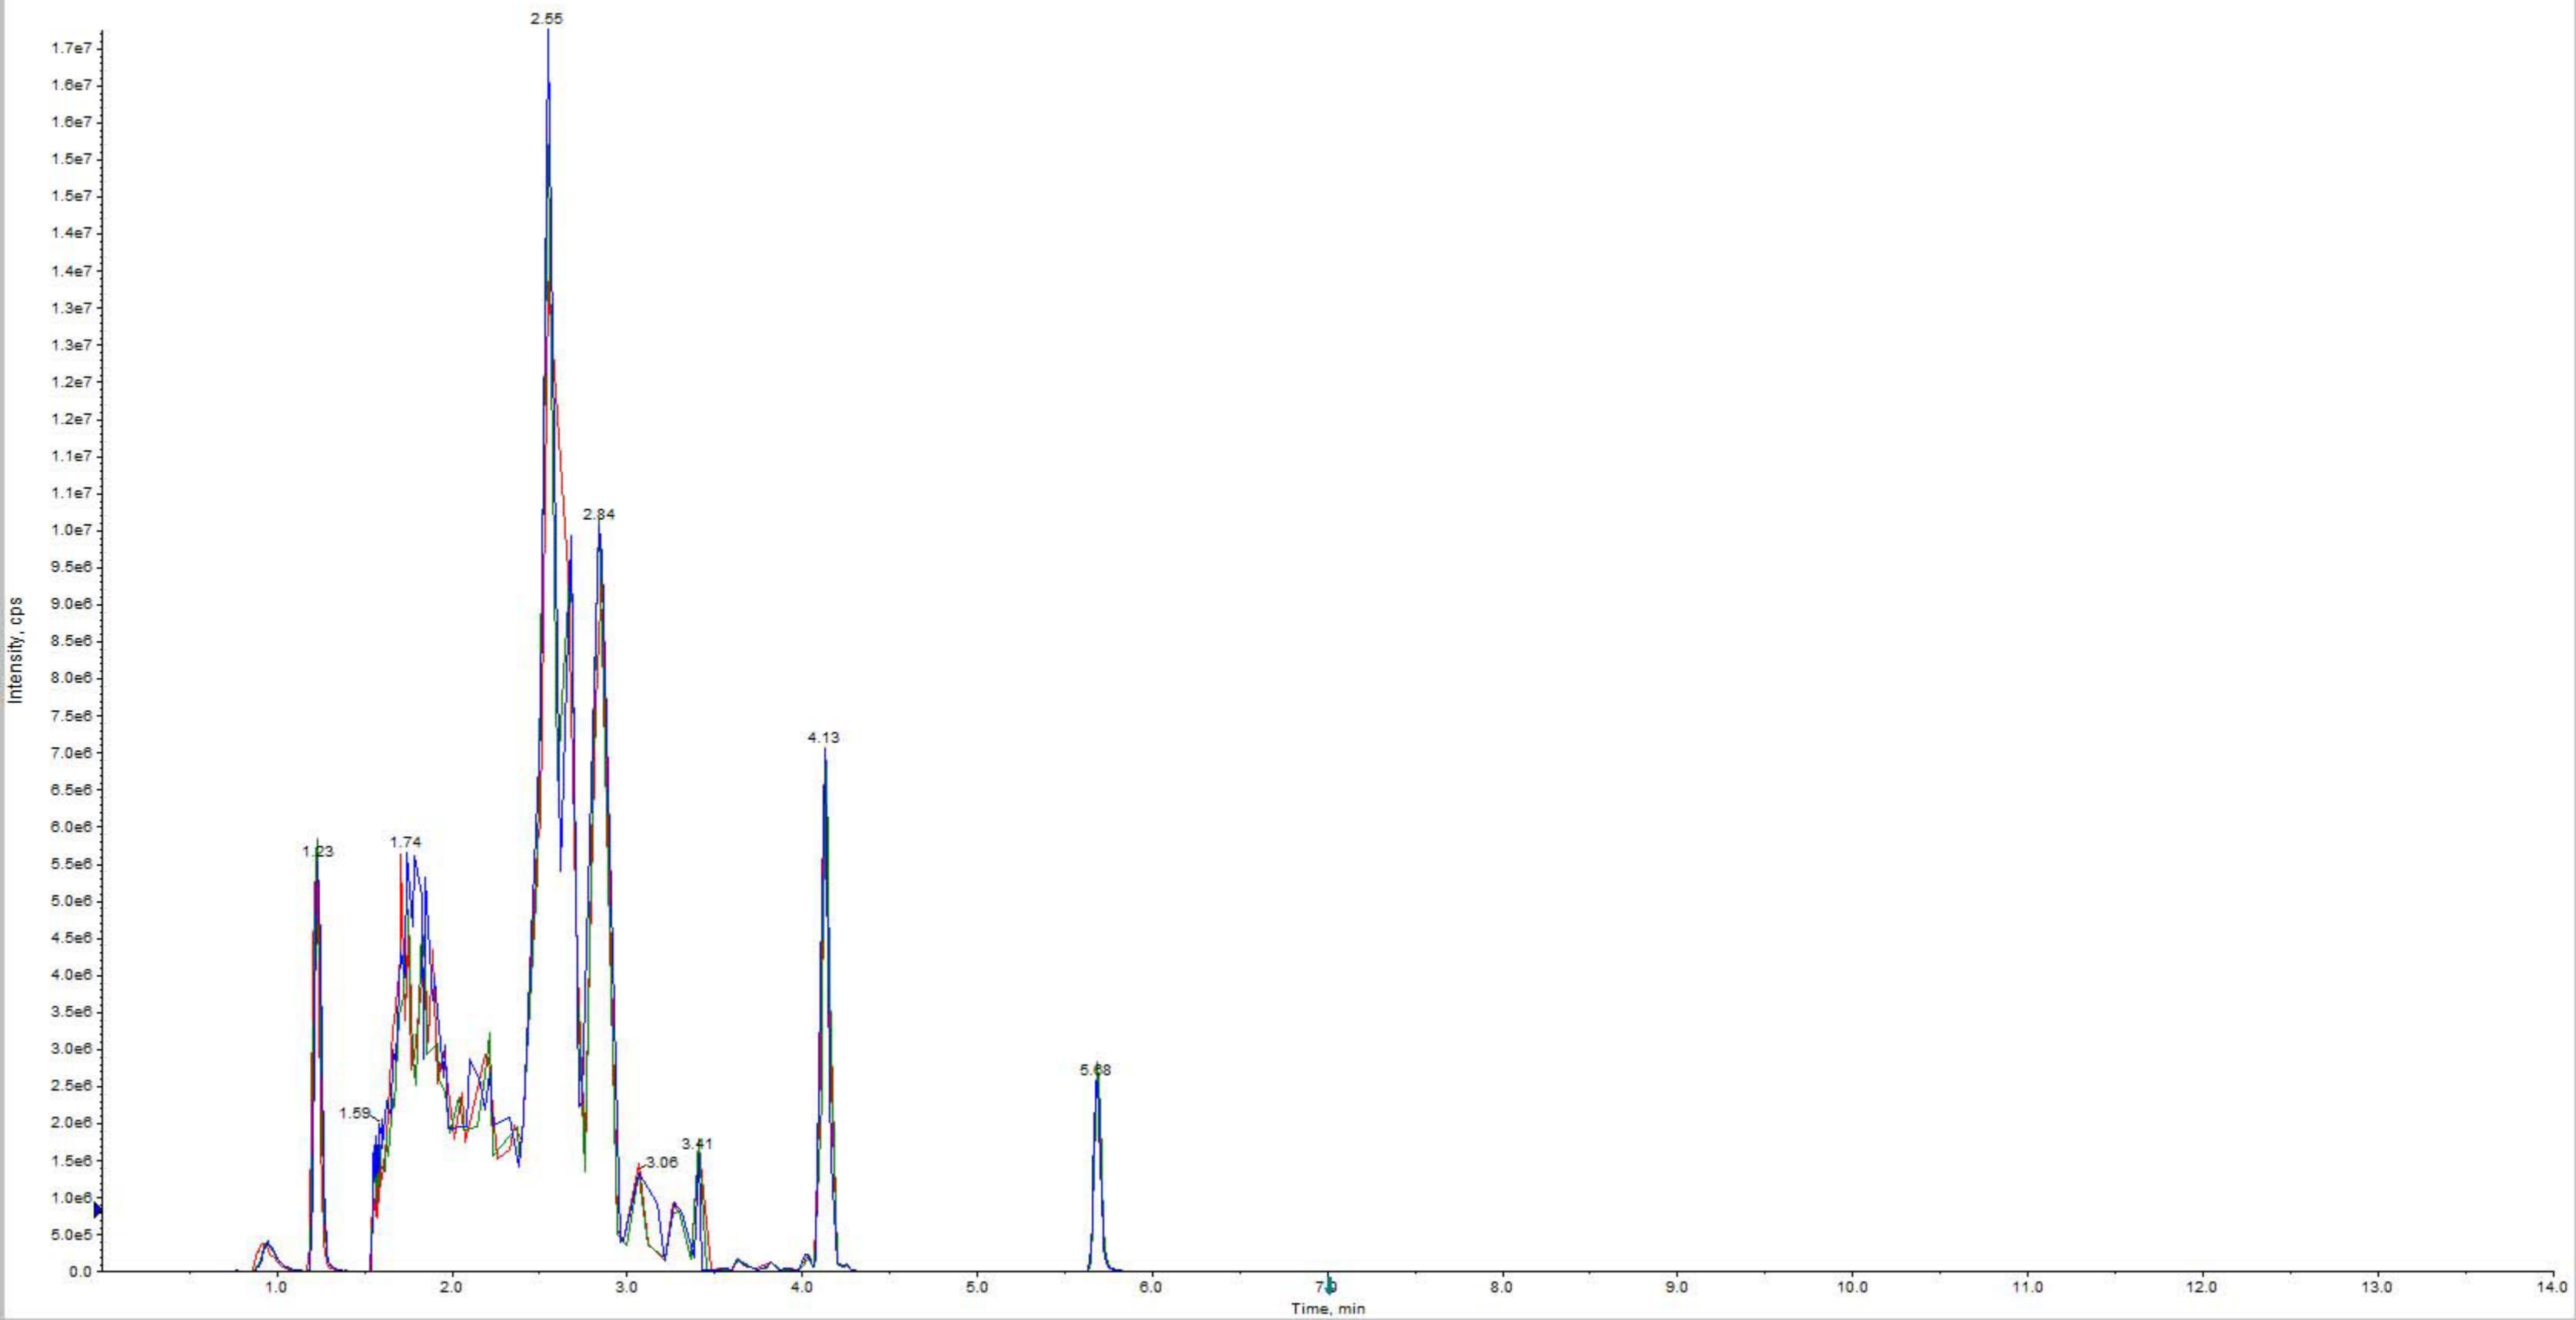

Supplement: FSN3-10-2611-s003.pdf [file FSN3-10-2611-s003.pdf]
